# Supplementary material for: Identification of new susceptibility loci for gastric non-cardia adenocarcinoma: pooled results from two Chinese genome-wide association studies
Source: HighWire-hosted journal article supplement (doi:10.1136/gutjnl-2015-310612), 2015-12-23
Supplement: gutjnl-2015-310612supp_figures.pdf [file gutjnl-2015-310612supp_figures.pdf]

## **SUPPLEMENTAL MATERIALS**

### **Identification of new susceptibility loci for gastric noncardia adenocarcinoma: Pooled results from two Chinese genome-wide association studies**

Zhaoming Wang, Juncheng Dai, Nan Hu, Xiaoping Miao, Christian C. Abnet, Ming Yang, Neal D. Freedman, Jinfei Chen, Laurie Burdette, Xun Zhu, Charles C. Chung, Chuanli Ren, Sanford M Dawsey, Meilin Wang, Ti Ding, Jiangbo Du, Yu-Tang Gao, Rong Zhong , Carol Giffen, Wenting Pan, Woon-Puay Koh, Ningbing Dai, Linda M Liao, Caiwang Yan, You-Lin Qiao, Yue Jiang, Xiao-Ou Shu, Jiaping Chen, Chaoyu Wang, Hongxia Ma, Hua Su, Zhendong Zhang, Lemin Wang, Chen Wu, Yong-Bing Xiang , Zhibin Hu, Jian-Min Yuan, Lu Xie, Wei Zheng, Dongxin Lin, Stephen J. Chanock, Yongyong Shi, Alisa M. Goldstein, Guangfu Jin, Philip R. Taylor, Hongbing Shen

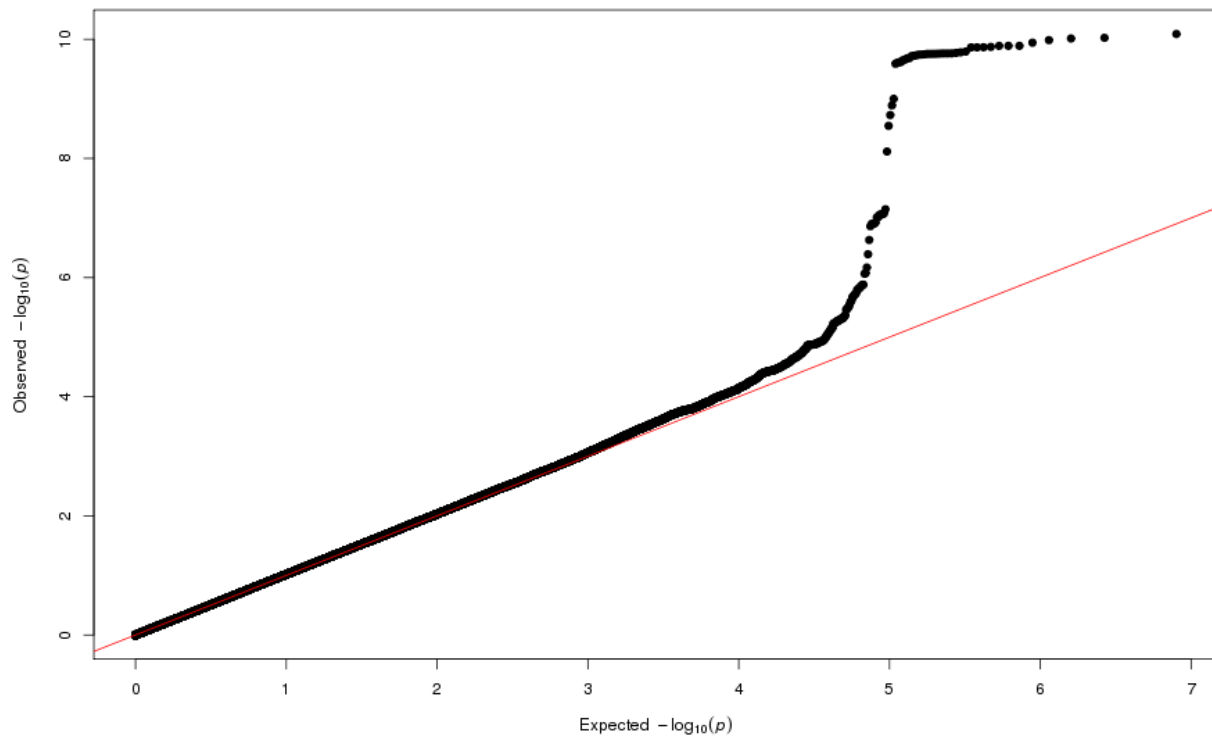

Supp. Figure 1 QQ Plot of the meta analysis  $p$  values for 3,996,998 SNPs after filtering out those with  $P_{\text{het}} < 1.0 \times 10^{-4}$  or  $I^2 > 75\%$ . The genomic control lambda value is 1.02.

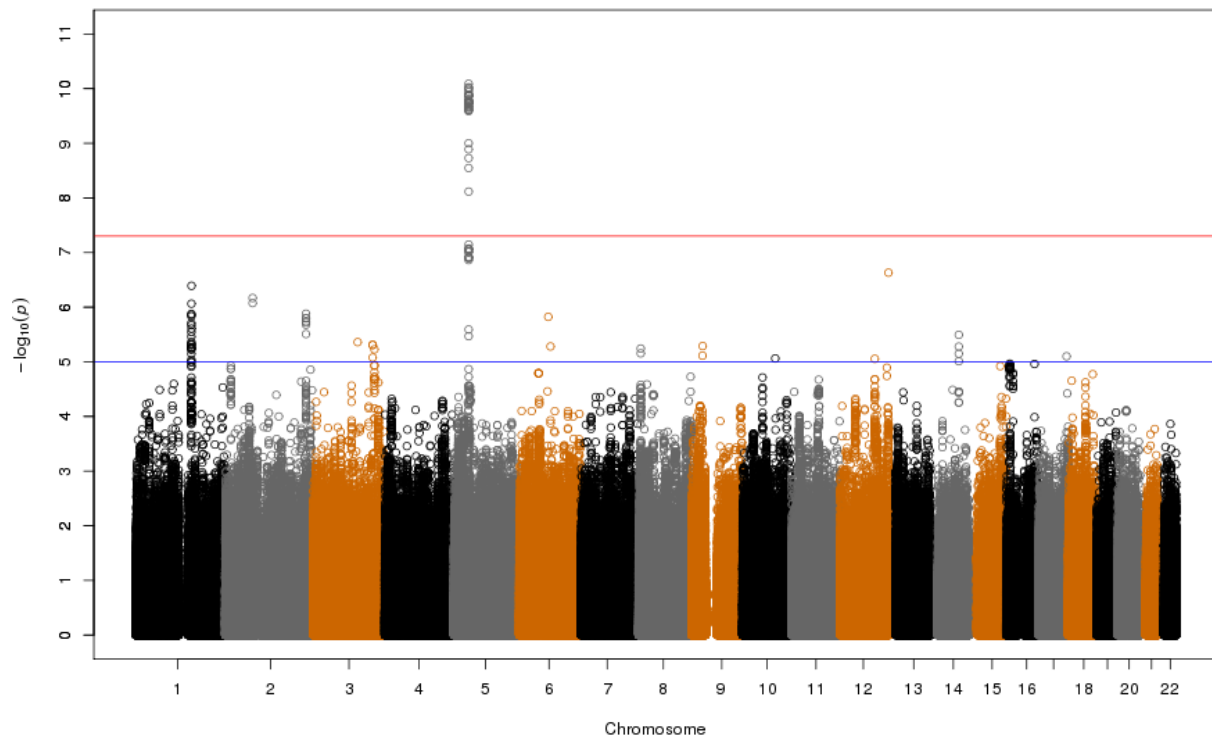

Supp Figure 2 Manhattan plot of the meta-analysis  $p$  values (stage1)
